# Supplementary material for: Grading Distress of Different Animal Models for Gastrointestinal Diseases Based on Plasma Corticosterone Kinetics
Source: PubMed Central journal article supplement (PMC6523747; doi:10.3390/ani9040145), 2019-04-03
Supplement: animals-09-00145-s001.pdf [file animals-09-00145-s001.pdf]

# Supplementary files: Grading Distress of Different Animal Models for Gastrointestinal Diseases Based on Plasma Corticosterone Kinetics

Simone Kumstel \*, Guanglin Tang, Xianbin Zhang, Hagen Kerndl, Brigitte Vollmar and Dietmar Zechner

**Table S1.** Distress score on mice.

| Observation                                           | Score |
|-------------------------------------------------------|-------|
| <b>I. Body weight</b>                                 |       |
| I-a decreased > 10% (compared to initial weight)      | 2     |
| I-b decreased > 20% (compared to initial weight)      | 5     |
| <b>II. General condition</b>                          |       |
| II-a tooth displacement, too long teeth               | 1 (A) |
| II-b fur dull, ruffled or untended                    | 2     |
| II-c eyes unclear or squinted                         | 2     |
| II-d untended orifices of the body                    | 3     |
| II-e abnormal posture                                 | 3     |
| II-f dehydration                                      | 3     |
| II-g short spasms or temporary paralysis symptoms     | 3     |
| II-h persistent (>30') cramping or paralysis          | 5     |
| II-i abnormal respiratory sounds or animal feels cold | 5     |
| <b>III. Spontaneous behavior</b>                      |       |
| III-a the animal is passive or overactive             | 2     |
| III-b pronounced apathy, hyperkinetic, or isolation   | 4     |
| III-c squeaking due to pain                           | 5     |
| III-d self-mutilation                                 | 5     |
| <b>IV. Flight behavior after contact</b>              |       |
| IV-a animal is passive or overactive                  | 2     |
| IV-b distinct apathy or hyperkinetic                  | 5     |
| <b>V. Process-specific criteria</b>                   |       |
| V-a wound healing disorder                            | 2     |
| V-b opening of the sutures by biting                  | 1 (B) |
| V-c local inflammation                                | 2     |
| V-d ascites                                           | 4     |
| Total score                                           | 0–66  |

Score points are stated per line as soon as one criteria applies. Even with several positive results per line, there is no addition of the points per line.

**Table S2.** Consequences according to distress score.

| Single Score | Total Score | Distress Level | Consequences                                                                                                                                     |
|--------------|-------------|----------------|--------------------------------------------------------------------------------------------------------------------------------------------------|
| A            |             | mild           | Anesthetize animal and shorten teeth. Document it.                                                                                               |
| B            |             | mild           | Inform the person in charge of the experiment. If necessary, anesthetize the animal and close the wound. Document it.                            |
| 1            |             | mild           | Inform the person in charge of the experiment. A sufficient frequency of observation is necessary, consider treatment options and document it.   |
| 2–4          |             | moderate       | Inform the person in charge of the experiment. Daily observation of the animal is necessary, consider treatment options and document it.         |
| 5            |             | severe         | In agreement with the person in charge euthanasia (preferably painless after anesthesia) has to be performed. Document it.                       |
|              | 3–4         | mild           | Inform the person in charge of the experiment. Daily observation of the animal is necessary, consider treatment options and document it.         |
|              | 5–15        | moderate       | Inform the person in charge of the experiment. Euthanasia or treating the animal plus daily observation of the animal is necessary. Document it. |
|              | >15         | severe         | In agreement with the person in charge euthanasia (preferably painless after anesthesia) has to be performed. Document it.                       |
